# Supplementary material for: Phenotyping Local Eggplant Varieties: Commitment to Biodiversity and Nutritional Quality Preservation
Source: Front Plant Sci. 2021 Jul 1;12:696272. doi: 10.3389/fpls.2021.696272 (PMC8281111; doi:10.3389/fpls.2021.696272)
Supplement: Supplementary file 1 [file Data_Sheet_1.xlsx]

## Sheet: Supl.1
	Supplementary Table 1. Quantitative traits for the conventional morphologic descriptors in the G1, G2, G3 and G4 local eggplant landraces (a total of 28 local different varieties) cultivated in Spain, grouped by skin colour (G1 = black-purple, G2 = striped, G3 = white, G4 = reddish purple). Statistics were performed for each group. Values are the mean ± SD for n = 8 plants (n = 10 for fruit trait…
	G1
		Plant length (cm)				Plant width (cm)				Branch density				Leaf length (cm)				Leaf width (cm)				Pedicel length (mm)				Pedicel thickness (mm)				Dented leaf blade				Blistering				Pilosity (per cm-2)				Number of flowers per inflorescence				Number of colours in commercial maturity
	B4	76.5875	±	4.55018	ab	108.8	±	8.84017	ab	6	±	0	a	22.3125	±	1.3076	ab	20	±	2.12132	a	11.6875	±	0.842509	ab	10.0925	±	0.635087	a	3.75	±	1.0351	c	3	±	0	b	5	±	0	c	1	±	0	c	2	±	0	c
	B8	85.8571	±	10.4312	ab	124.429	±	15.2955	bc	5	±	0	cd	20.5625	±	1.34795	abc	17.25	±	0.886405	bc	10.1875	±	1.06695	abc	8.70125	±	0.485223	ab	4.28571	±	0.48795	b	3.57143	±	0.534522	a	5	±	0	c	2	±	0	b	2	±	0	b
	B10	76.2143	±	7.90494	d	114.857	±	9.22729	cd	5.375	±	0.517549	bc	23.3125	±	4.92035	abc	18.375	±	3.95285	b	8.5625	±	1.87916	abc	7.31625	±	1.44133	bcd	5.75	±	0.46291	a	3	±	0	b	7	±	0	a	1	±	0	c	2.1	±	0.316228	c
	B11	65	±	3.62531	c	120.875	±	12.4377	d	6	±	0	a	22.375	±	3.80554	bc	17.75	±	3.29502	cd	8.9375	±	4.31308	bc	6.8125	±	0.865922	cd	2.25	±	0.46291	c	2.75	±	0.46291	bc	7	±	0	a	2	±	0	c	2.3	±	0.674949	c
	B12	65.75	±	5.49675	b	101.375	±	6.96804	bcd	5	±	0	d	20.125	±	1.76777	bc	14	±	2.53546	d	8.75	±	0.886405	bc	5.7275	±	0.573878	d	3.75	±	0.707107	b	3.75	±	0.707107	a	3	±	0	e	1	±	0	a	2	±	0	c
	B14	79.4375	±	8.38978	a	111.625	±	13.4264	a	5	±	0	cd	21.625	±	1.9411	ab	17.1875	±	2.8901	bcd	8.6875	±	1.57973	ab	7.27	±	0.513587	abc	6	±	0	a	2	±	0	d	4.42857	±	0.9759	d	1	±	0	a	2	±	0	a
	B19	80.375	±	6.32314	c	108.375	±	11.6243	ab	5.5	±	0.534522	b	22.8625	±	3.95255	ab	19.1875	±	2.97535	bc	10	±	1.06904	ab	7.41875	±	0.688652	bcd	4.25	±	1.98206	b	3	±	0	b	6	±	1.06904	b	2.5	±	0.57735	c	2	±	0	a
	B22	75	±	6.67618	b	102.625	±	7.63334	bcd	6.28571	±	0.48795	a	18.625	±	1.32961	a	13.9375	±	1.32119	bcd	9.1875	±	0.75297	a	5.6975	±	0.402732	bcd	2	±	0	c	3.75	±	0.46291	a	7	±	0	a	1.25	±	0.46291	c	2	±	0	c
	B23	88	±	7.05084	c	120	±	11.0324	bcd	6	±	0	a	22.5375	±	2.11048	a	17.3125	±	2.34426	b	9	±	3.33809	a	6.58125	±	0.59157	cd	2.71429	±	0.48795	c	2.71429	±	0.48795	bc	7	±	0	a	1	±	0	b	2.2	±	0.421637	b
	B26	79	±	9.53939	c	122.333	±	15.308	ab	5.5	±	0.534522	b	18.5	±	3.60555	c	14	±	3.5	d	8.83333	±	0.763763	c	5.04667	±	0.964642	e	2.375	±	0.744024	c	2	±	0	d	7	±	0	a	1	±	0	c	2	±	0	c
	B31	78.75	±	11.6588	c	113.875	±	10.5889	ab	5.375	±	0.517549	bc	21.1125	±	2.47296	a	15.9375	±	2.02551	b	6.6875	±	1.85043	a	6.1125	±	0.577402	bcd	1	±	0	d	2.375	±	0.744024	cd	5	±	0	c	1.875	±	0.353553	c	2	±	0	c
	G2
		Plant length (cm)				Plant width (cm)				Branch density				Leaf length (cm)				Leaf width (cm)				Pedicel length (mm)				Pedicel thickness (mm)				Dented leaf blade				Blistering				Pilosity (per cm-2)				Number of flowers per inflorescence				Number of colors in commercial maturity
	B1	76.5875	±	4.55018	d	108.8	±	8.84017	cd	6	±	0	ab	22.3125	±	1.3076	ab	20	±	2.12132	a	11.6875	±	0.842509	a	10.0925	±	0.635087	a	5.375	±	0.517549	d	1	±	0	f	7	±	0	a	1	±	0	c	2	±	0	b
	B2	85.8571	±	10.4312	abc	124.429	±	15.2955	a	5.71429	±	0.48795	bc	20.5625	±	1.34795	abc	17.25	±	0.886405	bcd	10.1875	±	1.06695	ab	8.70125	±	0.485223	b	6.5	±	0.92582	bc	1	±	0	f	5	±	0	b	2	±	0	b	2	±	0	b
	B5	76.2143	±	7.90494	d	114.857	±	9.22729	abc	6.25	±	1.0351	a	23.3125	±	4.92035	a	18.375	±	3.95285	abc	8.5625	±	1.87916	bc	7.31625	±	1.44133	c	7.25	±	1.16496	a	4	±	0.755929	c	5	±	0	b	1	±	0	c	2.1	±	0.316228	b
	B6	65	±	3.62531	e	120.875	±	12.4377	ab	5.28571	±	0.48795	cd	22.375	±	3.80554	ab	17.75	±	3.29502	abc	8.9375	±	4.31308	cd	6.8125	±	0.865922	cd	5	±	0	d	3	±	0	d	3	±	0	c	2	±	0	c	2.3	±	0.674949	a
	B9	65.75	±	5.49675	e	101.375	±	6.96804	d	5	±	0	d	20.125	±	1.76777	abc	14	±	2.53546	e	8.75	±	0.886405	bc	5.7275	±	0.573878	ef	6.75	±	0.46291	ab	4.875	±	0.834523	b	5	±	0	b	1	±	0	c	2	±	0	b
	B13	79.4375	±	8.38978	d	111.625	±	13.4264	bcd	5.5	±	0.534522	bcd	21.625	±	1.9411	ab	17.1875	±	2.8901	bcd	8.6875	±	1.57973	cd	7.27	±	0.513587	c	7	±	0	ab	7	±	0	a	5	±	0	b	1	±	0	c	2	±	0	b
	B15	80.375	±	6.32314	cd	108.375	±	11.6243	cd	5	±	0	d	22.8625	±	3.95255	a	19.1875	±	2.97535	ab	10	±	1.06904	ab	7.41875	±	0.688652	c	5	±	0	d	2.25	±	0.46291	e	3	±	0	c	2.5	±	0.57735	a	2	±	0	b
	B17	75	±	6.67618	d	102.625	±	7.63334	d	5.625	±	0.517549	bc	18.625	±	1.32961	c	13.9375	±	1.32119	e	9.1875	±	0.75297	bc	5.6975	±	0.402732	ef	7	±	0	ab	3	±	0	d	7	±	0	a	1.25	±	0.46291	b	2	±	0	b
	B21	88	±	7.05084	ab	120	±	11.0324	abc	5.71429	±	0.48795	bc	22.5375	±	2.11048	a	17.3125	±	2.34426	bcd	9	±	3.33809	bc	6.58125	±	0.59157	de	5.25	±	0.707107	d	2.25	±	0.46291	e	7	±	0	a	1	±	0	c	2.2	±	0.421637	b
	B25	79	±	9.53939	bcd	122.333	±	15.308	abc	5.33333	±	0.57735	bcd	18.5	±	3.60555	bc	14	±	3.5	de	8.83333	±	0.763763	bcd	5.04667	±	0.964642	f	7	±	0	ab	3	±	0	d	7	±	0	a	1	±	0	c	2	±	0	b
	B29	78.75	±	11.6588	cd	113.875	±	10.5889	abc	5.625	±	0.517549	bc	21.1125	±	2.47296	abc	15.9375	±	2.02551	cde	6.6875	±	1.85043	d	6.1125	±	0.577402	de	7	±	0	ab	6.625	±	0.517549	a	5	±	0	b	1.875	±	0.353553	b	2	±	0	b
	B30	91.875	±	8.64271	a	123.875	±	9.90581	a	6	±	0	ab	22.4875	±	4.23436	a	15.0625	±	2.32129	de	7.5625	±	1.80154	cd	5.80375	±	0.822608	ef	6	±	0	c	5	±	0	b	7	±	0	a	1	±	0	c	2.1	±	0.316228	b
	G3
		Plant length (cm)				Plant width (cm)				Branch density				Leaf length (cm)				Leaf width (cm)				Pedicel length (mm)				Pedicel thickness (mm)				Dented leaf blade				Blistering				Pilosity (per cm-2)				Number of flowers per inflorescence				Number of colors in commercial maturity
	B16	69.375	±	11.8435	b	99.75	±	9.48307	b	5	±	0	ab	19.75	±	1.30931	b	13.9375	±	1.80154	b	8.3125	±	3.3267	ab	6.84	±	0.597327	a	4.375	±	0.517549	b	6.57143	±	1.13389	a	5.75	±	1.0351	b	2	±	0	a	1	±	0	a
	B18	58.875	±	5.3569	c	85.5	±	15.7026	c	4.5	±	0.755929	b	19.625	±	1.21743	b	13.9375	±	1.76144	b	7	±	1.51186	a	5.95125	±	0.564053	b	4.71429	±	0.48795	ab	4	±	0	c	7	±	0	c	1.25	±	0.46291	b	1	±	0	a
	B28	89.875	±	6.62112	a	112.875	±	7.33753	a	5.625	±	0.744024	a	21.9375	±	2.71816	a	17.1875	±	3.23968	a	6.75	±	1.62569	b	6.775	±	0.97064	a	5	±	0	a	5.375	±	1.18773	b	3	±	0	a	1.71429	±	0.48795	a	1	±	0	a
	G4
		Plant length (cm)				Plant width (cm)				Branch density				Leaf length (cm)				Leaf width (cm)				Pedicel length (mm)				Pedicel thickness (mm)				Dented leaf blade				Blistering				Pilosity (per cm-2)				Number of flowers per inflorescence				Number of colors in commercial maturity
	B3	91.5625	±	5.39469	a	95.5	±	8.3666	a	6.5	±	0.53	b	21.8125	±	2.49195	a	16.6875	±	2.80226	a	8.375	±	1.15728	b	7.12875	±	1.09154	a	6.25	±	0.92	a	3	±	0	b	7	±	0	b	1.375	±	0.517549	a	1.6	±	0.516398	a
	B27	96	±	6.67618	a	104.125	±	9.73121	a	5.5	±	0.53	a	18.6875	±	1.60217	b	11.9375	±	1.42522	b	6.375	±	1.02644	a	4.8675	±	0.250471	b	3	±	1.04	b	3.63	±	0.74	a	4.25	±	1.03	a	1	±	0	a	1.7	±	0.483046	a
[truncated: 28 more columns]

## Sheet: Supl.2
	Supplementary Table 2. Colour measurements (L*, a*, b*) in the leaves from the G1, G2, G3 and G4 local eggplant landraces (a total of 28 local diferent varieties) cultivated in Spain, grouped by skin colour (G1 = black-purple, G2 = striped, G3 = white, G4 = reddish purple). Statistics were performed for each group. Values are the mean ± SD for n = 16 replicates (2 measurements per plant). In each…
	G1
		L*				a*				b*
	B4	29.6003	±	1.43915	cde	-6.51151	±	0.568905	c	9.24022	±	0.958594	bc
	B8	29.64	±	1.6578	cde	-6.33	±	0.473895	abc	9.1	±	0.787187	bc
	B10	28.7426	±	0.990913	e	-6.11393	±	0.575517	ab	8.66216	±	0.812136	c
	B11	29.8772	±	1.89635	cd	-5.9468	±	0.641649	a	9.12926	±	1.23471	bc
	B12	30.3203	±	1.58068	bc	-6.20273	±	0.394205	abc	9.5412	±	0.965629	b
	B14	30.127	±	0.981009	cd	-6.55037	±	0.468567	c	9.412	±	0.591127	b
	B19	30.0951	±	1.80846	cd	-6.66107	±	1.00722	c	9.73377	±	1.53997	b
	B22	31.2518	±	1.70791	ab	-7.58482	±	0.898706	d	10.9643	±	1.32833	a
	B23	31.4392	±	1.65848	a	-7.21346	±	0.649805	d	10.8125	±	1.25912	a
	B26	30.2409	±	2.00017	cd	-6.3344	±	0.629753	abc	9.82616	±	1.63974	b
	B31	29.0779	±	1.26792	de	-6.65238	±	0.794125	bc	9.32253	±	0.994566	bc
	G2
		L*				a*				b*
	B1	30.4813	±	1.26226	ab	-7.63273	±	0.612902	fg	10.4801	±	0.920568	bc
	B2	29.1712	±	1.6343	cde	-6.98469	±	0.663502	bc	9.38973	±	1.10719	g
	B5	27.8266	±	2.43392	f	-7.06627	±	0.898772	cd	9.66384	±	1.35461	efg
	B6	28.1118	±	1.9123	ef	-6.06545	±	0.801942	a	9.18177	±	1.24748	g
	B9	30.6001	±	1.29861	ab	-7.66765	±	0.848655	efg	10.5001	±	1.05124	b
	B13	28.7341	±	4.06794	bcd	-7.01794	±	1.35079	def	9.38069	±	1.65535	defg
	B15	29.5601	±	0.992086	bcd	-7.85634	±	0.525231	gh	10.298	±	0.793061	bcde
	B17	31.1783	±	1.80776	a	-6.61051	±	0.507823	b	9.95231	±	1.03623	bcdef
	B21	28.7342	±	1.24222	def	-6.73989	±	0.59878	bc	9.24019	±	0.828265	fg
	B25	31.0414	±	1.552	a	-6.97642	±	0.602998	cde	10.4139	±	1.17561	bcd
	B29	30.8028	±	1.23601	ab	-8.03219	±	0.806303	h	11.4603	±	1.2206	a
	B30	30.3312	±	2.09204	abc	-6.52005	±	0.665816	b	9.76067	±	1.02863	cdefg
	G3
		L*				a*				b*
	B16	32.3176	±	3.73379	a	-7.19059	±	1.10434	a	12.2133	±	2.84527	a
	B18	29.2752	±	1.13725	b	-7.11606	±	0.513661	a	9.76774	±	0.719996	b
	B28	31.1501	±	2.01249	a	-8.1987	±	0.907978	b	11.246	±	1.62809	a
	G4
		L*				a*				b*
	B3	29.1406	±	1.2382	b	-6.79869	±	0.523284	a	9.05401	±	0.954652	a
	B27	30.2912	±	1.39786	a	-6.67418	±	1.13621	a	9.67504	±	1.27885	a
